# Supplementary material for: Effects of Sumatriptan on PACAP, PAC-1, CGRP, VIP, and TRPV-1 Molecules in an Experimental Migraine Model
Source: Research Square preprint supplement (doi:10.21203/rs.3.rs-7785868/v1), 2025-10-20
Supplement: Supplementary file 1 [file ecfad667f91a0b8f54787ed7.docx]

Conflict of Interest and Authorship Conformation Form Please check the following as appropriate:

✓o All authors have participated in (a) conception and design, or analysis and interpretation of the data; (b) drafting the article or revising it critically for important intellectual content; and (c) approval of the final version.

✓o This manuscript has not been submitted to, nor is under review at, another journal or other publishing venue.

✓o The authors have no affiliation with any organization with a direct or indirect financial interest in the subject matter discussed in the manuscript


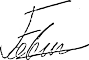
Author’s name Author's signature Date

| Fatma Öztürk Küp | 10.06.2024 |
| --- | --- |
| Seher Yılmaz | 05.06.2024 |
| Aslı Okan 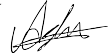 | 06.06.2024 |
| Sümeyye Uçar | 05.06.2024 |
| Ece Eroğlu 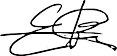 | 05.06.2024 |
| Şükrü Ateş 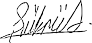 | 06.06.2024 |
| Abdülhadi Cihangir Uğuz 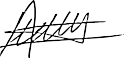 | 05.06.2024 |
| Züleyha Doğanyiğit 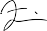 | 10.06. 2024 |

***Correspondence to Züleyha Doğanyiğit, PhD**

[zuleyha.doganyigit@gmail.com](mailto:zuleyha.doganyigit@gmail.com) [zuleyha.doganyigit@bozok.edu.tr](mailto:zuleyha.doganyigit@bozok.edu.tr)

Phone:+ 90 03542126201 Fax: + 90 0 354 4375285

Yozgat Bozok University Faculty of Medicine Department of Histology- Embryology , Yozgat, Turkey
